# Supplementary material
Source: Springer Nature journal article supplement (https://www.springermedizin.de/resource/supplementary/12890_2006_77_MOESM3_ESM.pdf/9505968)

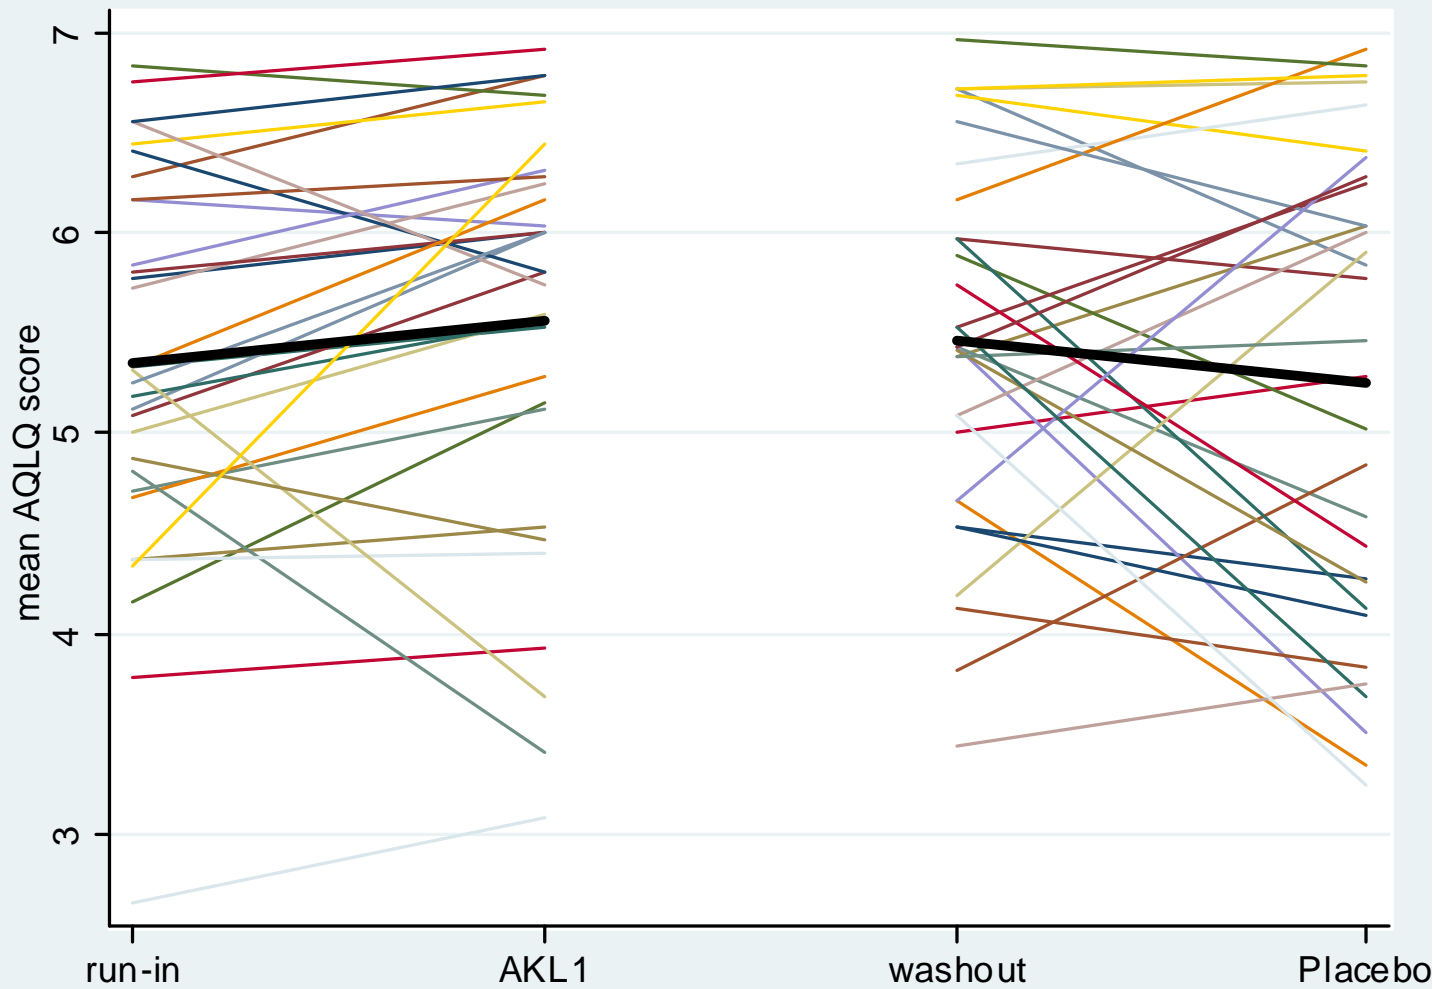

Supplement: MOESM3 [file 9505968]
